# Supplementary material for: Utilising Pancreatic Exocrine Insufficiency in the Detection of Resectable Pancreatic Ductal Adenocarcinoma
Source: MDPI journal article supplement (doi:10.3390/cancers15245756), 2023-12-08
Supplement: s1 [file s1]

### **Calculation of cumulative Percentage Dose Recovered of $^{13}\text{C}$**

The enrichment of  $^{13}\text{C}$  (atom % excess) in breath at time  $t$  was calculated from the  $^{13}\text{C}$  abundance measurements and used, with a measure of the total  $\text{CO}_2$  production, to calculate the cumulative percentage dose recovered (cPDR) over 240 minutes, which was expressed as a percentage of the administered  $^{13}\text{C}$  -MTG dose as described below:

$$\text{Percent } ^{13}\text{C-dose recovered (PDR) (\%/min)} = \frac{\text{Atom \% excess} \times \text{VCO}_2 \text{ (mmol/min)} \times 100}{\text{Dose (mmol)}^1}$$

$$\text{where Atom \% excess} = \frac{\text{delta over baseline (DOB)} \times \text{RPDB} \times 100}{1000}^2$$

$\text{DOB} = \delta^{13}\text{C}_t - \delta^{13}\text{C}_0$  which is defined as the difference between the basal  $^{13}\text{C}$  abundance of breath  $\text{CO}_2$  before administration of  $^{13}\text{C}$  -MTG ( $\delta^{13}\text{C}_0$ ) and the  $^{13}\text{C}$ -abundance of breath  $\text{CO}_2$  at a time point after administration of  $^{13}\text{C}$ -MTG ( $\delta^{13}\text{C}_t$ ) relative to Vienna Pee Dee Belemnite (PDB).  $\text{RPDB} = 0.0112372$  is the  $^{13}\text{C}/^{12}\text{C}$  isotopic ratio of Vienna Pee Dee Belemnite.

$\text{VCO}_2$  is the total expiratory  $\text{CO}_2$  production (mmol/h) which was assumed to be  $300\text{mmol/min}^2$  multiplied by the body surface area. The body surface area was calculated by the weight-height formula of Haycock et al<sup>3</sup>.

*Dose (mmol) is the amount of  $^{13}\text{C}$ -MTG administered (mg) / molecular weight of  $^{13}\text{C}$ -MTG  $\times n \times P/100$  where  $n$  is the number of  $^{13}\text{C}$  atoms per molecule of MTG and  $P$  is the  $^{13}\text{C}$  isotopic purity (%) of  $^{13}\text{C}$ -MTG.*

The cPDR over the  $n$  time points up to time  $t$  was then calculated using the trapezoidal method<sup>4</sup>:

$$\text{cPDR over time } t = [\text{PDR}(n) + \text{PDR}(n-1)] / 2 \times \text{change in time (min)} + \text{cPDR}(n-1).$$

The results of the  $^{13}\text{C}$ -MTG breath test were then expressed as the cumulative percentage of  $^{13}\text{C}$ -label recovered on breath over 240 minutes (cPDR<sub>240</sub>).

## **References**

1. Herzog DC, Delvin EE, Albert C, et al. 13C-labeled mixed triglyceride breath test (13C MTG-BT) in healthy children and children with cystic fibrosis (CF) under pancreatic enzyme replacement therapy (PERT): a pilot study. *Clin Biochem* 2008; 41: 1489-1492. 2008/09/27. DOI: 10.1016/j.clinbiochem.2008.08.087.
2. Jonderko K, Dus Z, Szymszal M, et al. Normative values for the 13C-mixed triglyceride breath test in two age groups. *Med Sci Monit* 2009; 15: CR255-259. 2009/04/28.
3. Haycock GB, Schwartz GJ and Wisotsky DH. Geometric method for measuring body surface area: a height-weight formula validated in infants, children, and adults. *J Pediatr* 1978; 93: 62-66. 1978/07/01. DOI: 10.1016/s0022-3476(78)80601-5.
4. Matthews JN, Altman DG, Campbell MJ, et al. Analysis of serial measurements in medical research. *BMJ* 1990; 300: 230-235. 1990/01/27. DOI: 10.1136/bmj.300.6719.230.
