# Supplementary material for: Utilising Pancreatic Exocrine Insufficiency in the Detection of Resectable Pancreatic Ductal Adenocarcinoma
Source: Cancers (Basel). 2023 Dec 8;15(24):5756. doi: 10.3390/cancers15245756 (PMC10741412; doi:10.3390/cancers15245756)
Supplement: Supplementary file 1 [file cancers-15-05756-s001.zip › Supplementary File S3.txt]

syntax for Youden
-----------------

logit grouphvpdac_roc cpdr240, no log

lsens, gensens (sensitivity) genspec(specificity)

generate float youden_index= sensitivity + specificity -1

egen float max = max(youden_index)

list cpdr240 if youden_index == max

     +----------+
     |  cpdr240 |
     |----------|
     | 17.69996 |
     +----------+

For FE-1:

list FE_1 if youden_index == max

     +------+
     | FE_1 |
     |------|
     |  356 |
     +------+


for CP this is:


list cpdr240 if youden_indexcp == maxcp

     +----------+
     |  cpdr240 |
     |----------|
     | 27.12888 |
     +----------+

list FE_1 if youden_indexcp == maxcp

     +------+
     | FE_1 |
     |------|
     |  386 |
     +------+
